# Supplementary material
Source: PubMed Central journal article supplement (PMC3989867)
Supplement: NIHMS563298-supplement-Supplementary_Data.pdf [file NIHMS563298-supplement-Supplementary_Data.pdf]

## Alignment of SOD1 Sequences

| FALS Mutations |   | T           |                 | G A |                  |   | R | D  | R                        | R                  | I                 | S                 | R          | C |   |                     |                   |   |   |   |
|----------------|---|-------------|-----------------|-----|------------------|---|---|----|--------------------------|--------------------|-------------------|-------------------|------------|---|---|---------------------|-------------------|---|---|---|
|                |   | S           | F               | Q   | R                | M | S | SC | KL                       | RV                 | S                 | R                 | CRFQK      | R | I | S                   | R                 | S | Y | R |
|                |   | V           | GEV             | V   | R                | M | S | SC | KL                       | RV                 | S                 | R                 | CRFQK      | R | I | S                   | R                 | S | Y | R |
| Homo           | 1 | at          | <b>KAVCVLKG</b> | D   | <b>GPVqGiInF</b> |   |   |    | eqkesngpVk               | vwGsIk <b>GLTE</b> | <b>GlHGfHVHeF</b> | <b>GDNTaGCTSA</b> |            |   |   | Gp <b>HFNP</b> lSrK | <b>HGGPkDeERH</b> |   |   |   |
| Mus            | 1 | am          | kavcvlkg        | d   | gpvqgtihf        |   |   |    | eqkasgepvv               | lsgqItglte         | Gqhgfhvhqy        | gdntqgctsa        |            |   |   | gphfnphSkK          | hggpadeerh        |   |   |   |
| Rattus         | 1 | am          | kavcvlkg        | d   | gpvqgvihf        |   |   |    | eqkasgepvv               | vsgqitglte         | gehgfhhvhqy       | gdntqgctta        |            |   |   | gphfnphskk          | hggpadeerh        |   |   |   |
| Canis          | 1 | em          | kavcvlkg        | q   | gpvegthf         |   |   |    | vqkgsq pvv               | vsgtitglte         | gehgfhhvhqf       | edxtqgctsa        |            |   |   | gphfnplsck          | hggpkdquerh       |   |   |   |
| Rabbit         | 1 | at          | kavcvlkg        | d   | gpveatihf        |   |   |    | eqkgtg pvv               | vkgritglte         | glhefhvhqf        | gdnrqgctsa        |            |   |   | gphfnplsck          | hggpkdeerh        |   |   |   |
| Bos            | 1 | at          | kavcvlkg        | d   | gpvqgtihf        |   |   |    | eakgdt vv                | vtgsitglte         | gdhgfhvhqf        | gdntqgctsa        |            |   |   | gphfnplsck          | hggpkdeerh        |   |   |   |
| Equus          | 1 | al          | kavcvlkg        | d   | gpvhgvihf        |   |   |    | eqqegggpvv               | lkgfielgtk         | gdhgfhvhfef       | gdntqgctta        |            |   |   | gahfnplsck          | hggpkdeerh        |   |   |   |
| Ovis           | 1 | at          | kavcvlkg        | d   | gpvqgtirf        |   |   |    | eakgdk vv                | vtgsitglte         | gdhgfhvhqf        | gdntqgctsa        |            |   |   | gphfnplsck          | hggpkdeerh        |   |   |   |
| Sus            | 1 | at          | kavcvlkg        | d   | gpvqgtiyf        |   |   |    | elkgekt vl               | vtgtikglae         | gdhgfhvhqf        | gdntqgctsa        |            |   |   | gphfnpesck          | hggpkdquerh       |   |   |   |
| Cervus         | 1 | at          | kavcvlkg        | d   | gpvqgtirf        |   |   |    | eakgh t vv               | vtgsitglte         | gdhgfhvhqf        | gdntqgctsa        |            |   |   | gphfnplsck          | hggpkdeerh        |   |   |   |
| Gallus         | 1 | atlkavcvmkg |                 | d   | apvegvihf        |   |   |    | qqqgsg pvk               | vtgkitglsd         | gdhgfhvhfef       | gdntngctsa        |            |   |   | gahfnpegkq          | hggpkdadrh        |   |   |   |
| Danio          | 1 | vn          | kavcvlkg        | t   | gevtgtvyf        |   |   |    | nqegekpkpvk              | vtgeitgltp         | gkhgfhhvhaf       | gdntngcisa        |            |   |   | gphfnphdkt          | hggptdsvrh        |   |   |   |
| Trout          | 1 | am          | kavcvlkg        | t   | gevtgtvff        |   |   |    | eqegadgpvk               | ligeisglap         | gehgfhhvhay       | gdntngcmsa        |            |   |   | gphfnphnqt          | hggptdavrh        |   |   |   |
| A.v.           | 1 | stn         | aiavlrnt        |     | vsgvirf          |   |   |    | kqdkegspti               | ingeikgltp         | glhgfhvhqy        | gdtngcisa         |            |   |   | gphfnphnkt          | hggptdeirh        |   |   |   |
| Dros.          | 1 | vv          | kavcving        | d   | akgtvff          |   |   |    | eqessgtpvk               | sgevcglak          | glhgfhvhfef       | gdntngcmss        |            |   |   | gphfnpygke          | hgapvdenrh        |   |   |   |
| S.cerv         | 1 | v           | qavavlkg        | d   | agvsgvkvf        |   |   |    | eqasesepttv              | syeiagnspn         | aergfhhief        | gdatngcvsa        |            |   |   | gphfnpfkkt          | hgaptdevrh        |   |   |   |
| S.pombe        | 1 | v           | ravavlrn        | d   | skvsgvvtf        |   |   |    | eqvdqnsqsvv              | ivdlvgndan         | akrgfhhqf         | gdntngctsa        |            |   |   | gphfnpegkt          | hgdrtavvrh        |   |   |   |
| Candida        | 1 | v           | kavavvrg        | d   | skvqgtvhf        |   |   |    | eqesesaptt               | isweiegn dpn       | alrgfhhqf         | gdntngctsa        |            |   |   | gphfnpfgkq          | hgapedderh        |   |   |   |
| D.v.           | 1 | v           | qavavlrs        | d   | skvsrclt         |   |   |    | snnrqsiltqllhgrfl gn dan |                    | alrgfhhvhtf       | gdntnglyfcwt      | slhfnpftke |   |   |                     | hgapeddnrh        |   |   |   |
| C.n.           | 1 | v           | kavavlkg        | d   | shvygtitf        |   |   |    | tqdsegapvc vsgeik nldad  |                    | akrgfhhfef        | gdntngctsa        |            |   |   | gphynpfhkn          | hggptaaerh        |   |   |   |
| C.p.           | 1 | v           | kavavlrn        | d   | akvqgtvfv        |   |   |    | eqesesaptt itw ditgn dan |                    | akrgfhhhtf        | gdntngctsa        |            |   |   | gphfnphgkt          | hgaptdearh        |   |   |   |
| N.c.           | 1 | v           | kavavvrg        | d   | snvkgtvif        |   |   |    | eqesesaptt ity disgn dpn |                    | akrgfhhhtf        | gdntngctsa        |            |   |   | gphfnphggt          | hgdrtavvrh        |   |   |   |
| Plant          | 1 | v           | kavvvlss        | seg | vsgtvqf          |   |   |    | tqegsgpttv               | tgnvsglrp          | glhgfhvhal        | gdtngcmst         |            |   |   | gphfnpagke          | hgapedetrh        |   |   |   |

S, R, V

| FALS      |                     | d-d                 | D,                  | H                   |                    | i→stop122 *              | H                 |               |  |  |  |  |  |  |
|-----------|---------------------|---------------------|---------------------|---------------------|--------------------|--------------------------|-------------------|---------------|--|--|--|--|--|--|
| Mutations | F DM TV             | C,                  | G G                 | dd                  | MF                 | G d→stop131              | i→stop150         | E SG G S      |  |  |  |  |  |  |
|           | VRSA VA             | A TNM               | K N                 | FLV V               | TTAG L             | VHSi→stop133             | dN                | KG * FTRRIT T |  |  |  |  |  |  |
| Homo 81   | V <b>GD</b> LGNVTAd | kd <b>GvAdV</b> Sie | Dsv <b>ISLSG</b> dh | c <b>IIGRTlV</b> VH | EKa <b>DDLgkGG</b> | <b>NEESTKTGNA</b>        | <b>GsRLACGVIG</b> | <b>Iaq</b>    |  |  |  |  |  |  |
| Mus 81    | vgdlgnvtag          | kdgvanvsie          | drvislsgeh          | siigrtmvvh          | ekqddlgkgg         | neestktgna               | gsrlacgvig        | iaq           |  |  |  |  |  |  |
| Rat 81    | vgdlgnvaag          | kdgvanvsie          | drvislsgeh          | siigrtmvvh          | ekqddlgkgg         | neestktgna               | gsrlacgvig        | iaq           |  |  |  |  |  |  |
| Canis81   | vgdlgnvtag          | kdgvaivsie          | dslialsgdy          | siigrtmvvh          | ekrddlgkgd         | neestqtgna               | gsrlacgvig        | iaq           |  |  |  |  |  |  |
| Rab 81    | vgdlgnvtag          | sngvadvie           | dsvislsgdm          | svigrtlvvh          | ekeddlgkgg         | ndestktgna               | gsrlacgvig        | isp           |  |  |  |  |  |  |
| Bos 81    | vgdlgnvtad          | kngvaivdiv          | dplislsgey          | siigrtmvvh          | ekpddlgrgg         | neestktgna               | gsrlacgvig        | iak           |  |  |  |  |  |  |
| Equus81   | vgdlgnvtad          | engkadvdmk          | dsvislsgkh          | siigrtmvvh          | ekqddlgkgg         | neestktgna               | gsrlacgvig        | iap           |  |  |  |  |  |  |
| Ovis 81   | vgdlgnvkad          | kngvaivdiv          | dplislsgey          | siigrtmvvh          | ekpddlgrgg         | neestktgna               | ggrlacgvig        | iap           |  |  |  |  |  |  |
| Sus 81    | vgdlgnvtag          | kdgvatvyie          | dsvialsgdh          | siigrtmvvh          | ekpddlgrgg         | neestktgna               | gsrlacgvig        | itq           |  |  |  |  |  |  |
| Cerv 81   | vgdlgnvtad          | kngvakvdiv          | dslislsgdh          | siigrtmvvh          | ekpddlgrgg         | neestktgna               | rnrlacgvig        | iaq           |  |  |  |  |  |  |
| Gal 81    | vgdlgnvta           | kggvaeveie          | dsvislsgph          | ciigrtmvvh          | aksddlgrgg         | d n esklktgna            | gprlacgvig        | iaqc          |  |  |  |  |  |  |
| Danio81   | vgdlgnvtad          | asgvakieie          | damltlsgqh          | siigrtmvvh          | ekeddlgkgg         | neeslktgna               | ggrlacgvig        | itq           |  |  |  |  |  |  |
| Trout81   | vgdlgnvtag          | adnvakinie          | dkmltltgpd          | siigrtmvvh          | ekaddlgkgg         | neeslktgna               | ggrqacgvig        | iaq           |  |  |  |  |  |  |
| A.v. 81   | vgdlgnivag          | adgtahidip          | nkqvqllgpn          | siigrsivvh          | adeddlgkvgdkkn     | eslkt gnagarvacgivaigads |                   |               |  |  |  |  |  |  |
| Dros 81   | lgdlgnieat          | gdcptkvnitdsk       | itlfgad             | siigrtvvh           | adaddlgqgg         | h elskstgnagarigcgvig    | iakv              |               |  |  |  |  |  |  |
| S.c 81    | vgdmgnvktad         | engvakgsf           | kdslikligpt         | svvgrsvvh           | agqddlgkgd         | t eslktgna               | gprpacgvig        | ltq           |  |  |  |  |  |  |
| S.p. 81   | vgdlgnlesd          | aqgniktft           | sdsvislfgan         | siigrtvvh           | ageddlgkgt         | s eeslktgna              | garnacgvig        | iaq           |  |  |  |  |  |  |
| C.a. 81   | vgdlgnistd          | gngvakgt            | kqdllickligkd       | silgrtinvvh         | agtddygkgg         | f eds kttghagarpacgvig   | ltq               |               |  |  |  |  |  |  |
| D.v. 81   | vgdlgnvttd          | tsgvakgs            | kqdlfvkligqn        | silgrtvvh           | agtddlgkgg         | naeslktgna               | garlacgvig        | ltnkpn        |  |  |  |  |  |  |
| C.n. 81   | vgdlgnvqtn          | gcgvamvdi           | sdksvislfgph        | siigrsmvvh          | agtddlgkgg         | neeslktgna               | garlacgvig        | iaa           |  |  |  |  |  |  |
| C.p. 81   | vgdlgnletd          | gggnakgsv           | kdehvkligph         | svigrtvvh           | agtddlgkgd         | neeslktgna               | gprpacgvig        | iss           |  |  |  |  |  |  |
| N.c. 71   | vgdlgnietd          | aqgnakgtv           | tdnlvkligpe         | svigrtvvh           | agtddlgkgg         | neeslktgna               | gprpacgvig        | isq           |  |  |  |  |  |  |
| Plant71   | agdlgnitvg          | ddgtatftii          | dsqipltgp           | snivgrsvvh          | adpddlgrgg         | h elskatgnaggrvacgvig    | lqq               |               |  |  |  |  |  |  |

Largest C-terminal Deletion

Sequences of SOD1 utilized in Figure 1. (Entrez - Protein Locus Number)

Homo sapien Human SOD1 (P00441)

1 matkavcvlk gdgpvqgiin feqkesngpv kvwgsikglt eglhgfhvhe fgdntagcts agphfnplsr khggpkdeer hvgdlnvta  
91 dkdgvadvisi edsvislsgd hciigrtlvv hekaddlgkg gneestktgn agsrlacgvi giaq

Mus musculus Mouse (P08228)

1 mamkavcvlk gdgpvqgtih feqkasgepv vlsqgitgt egqhgfhvhq ygdntqgcts agphfnphsk khggpadeer hvgdlnvta  
91gkdgvanvisi edrvislsge hsiigrtmvv hekqddlgkg gneestktgn agsrlacgvi giaq

Rattus norvegicus Rat (P07632)

1 amkavcvlk gdgpvqgvih feqkasgepv vvsqgitgt egehghfhvhq ygdntqgctt agphfnphsk khggpadeer hvgdlnvaa  
91 gkdgvanvisi edrvislsge hsiigrtmvv hekqddlgkg gneestktgn agsrlacgvi giaq

Canis familiaris Dog (AAL61608)

1 memkavcvlk gqpvvegth fvqksgpvv vsqgitgte gehghfhvhqf edxtqgctsa gphfnplskk hggpkdquerh vgdlnvtag  
91 kdgvaisie dslialsgdy siigrtmvvh ekrdldlgkgd neestqtgna gsrlacgvi iaq

Rb Rabbit Oryctolagus cuniculus (P09212)

1 matkavcvlk gdgpveatih feqkgtgpv vkgritgte glhefhvhqf gdnrqgctsa gphfnplskk hggpkdeerh vgdlnvtag  
91 sngvadvie dsvislsgdm svigrtlvvh ekedldlgkg ndestktgna gsrlacgvi isp

Bos taurus Cow (P00442)

1 matkavcvlk gdgpvqgtih feakgdtvvv tgsitgteg dhghfhvhqfg dntqgctsag phfnplskkh ggpkdeerhv gdlgnvtadk  
91 ngvaivdivd plislsgays iigrtmvvhe kpddlgrggn eestktgnag srlacgvi gi ak

Equus caballus Horse (P00443)

1 malkavcvlk gdgpvhgvih feqqqeggpv vlkgfielt kgdhghfhvhe fgdntqgctt agahfnplsk khggpkdeer hvgdlnvta  
91 dengkadvdm kdsvislsgk hsiigrtmvv hekqddlgkg gneestktgn agsrlacgvi giap

Ovis aries Sheep (P09670)

1 atkavcvlkg dgpvqgtirf eakgdkvvvt gsitgtegd hgfhvhqfgd ntqgctsagp hfnplskkhg gpkdeerhvg dlgnvkadkn  
91 gvaivdivdp lislsgaysi iigrtmvvhk pddlgrggn eestktgnagg rlacgvi gi p

Sus scrofa Pig (P04178)

1 atkavcvlkg dgpvqgtiyf elkgektlvv tgitklaeg dhghfhvhqfg dntqgctsag phfnpeskkh ggpkdquerh gdlgnvtagk  
91 dgvatvyied svialsgdhs iigrtmvvhe kpddlgrggn eestktgnag srlacgvi tq

Cervus elaphus Deer (O46412)

1 matkavcvlk gdgpvqgtir feakghtvvv tgsitglteg dhghfvhqfg dntqgtsag phfnplskkh ggpkdeerhv gdlnvntadk  
91 ngvakvdivd slislsgehs iigrtmvvh kpdldgrggn eestktgnar nrlacgvigi aq

Gallus gallus Chicken (P80566)

1 matlkavcvm kgdapvegvi hfqqqgsgpv kvtkgitgls dgdhghfvhe fgdntngcts agahfnpegk qhggpkdadr hvgdlnvnta  
91 kggvaeveie dsvisltgph ciigrtmvvh aksddlgrgg dneskltgna gprlacgvig iakc

Danio rerio Zebra Fish (O73872)

1 mvnkavcvlk gtgevtgtvy fnqegekpv kvteitglt pgkhghfvha fgdntngcis agphfnphdk thggptdsr hvgdlnvnta  
91 dasgvakiei edamltsqg hsiigrtmvi hekeddlgkg gneeslktgn aggrlacgvi gitq

Trout - Oncorhynchus mykiss (AAL79162)

1 mamkavcvlk gtgevtgtvf feqegadgpv kligeisgla pgehghfvha ygdntngcms agphfnphnq thggptdavr hvgdlnvnta  
91 gadnvakini qdkmltltgp dsiigrtmvi hekaddlgkg gneeslktgn aggrqacgvi giaq

A.v. Acanthocheilonema viteae Nematode (CAB46812)

1 mstnaiavlr gntvsgvirf qkdkegspti ingeikgltp glhghfihqy gdtngcisa gphfnphnkt hggptdeirh vgdlnivag  
91 adgtahidip nkqvllgpn siigrsvvh adeddlgkgv gdkkneslkt gnagarvacg ivaigads

Dros. Drosophila melanogaster (NP\_476735)

1 mvvkavcvin gdakgtvffe qessgtpkv sgevcglakg lhghfvhefg dntngcmssg phfnpygkeh gapvdenrhl gdlgnieatg  
91 dcptkvnitd skitlfgads iigrtvvh adaddlgqggh elskstgnag arigcgvigi akv

S.c. Saccharomyces cerevisiae Yeast NP 012638 (P00445)

1 mvqavavlk dagvsgvkvf eqasesept vsyeiagnsp naergfhihe fgdatngcvs agphfnpchk thgaptdevr hvgdmgnvkt  
91 dengvakgsf kdslikligp tsvvgrsvvi hagqddlgkg dteeslktgn agprpacgvi gltn

S.p. Schizosaccharomyces pombe Yeast (P28758)

1 mvravavlr dskvsgvvtf eqvdqnsqvs vivdlvnda nakrgfhihq fgdntngcts agphfnpegk thgdrtaavr hvgdlnles  
91 daqgnikttf dsvislfga nsiigrtivi hageddlgkg tseeslktgn agarnacgvi giav

C.a. Candida albicans (O59924)

1 mvkavavrg dskvqgtvhf eqesesaptt isweiegnp nalrgfhihq fgdntngcts agphfnpchk qhgapedder hvgdlnist  
91 dgngvakgtk qdllikligk dsilgrtivv hagtddygkg gfedskttgh agarpacgvi gltq eskltgna gprlacgvig iakc

D.v. Debaryomyces vanrijiae va. Yarrowii Marine Yeast (AAK82336)

1 mvqavavlrs dskvsrclt snnrqsltl llhgrflgnd analrgfhhv fgdntngly fcwtslhfnp ftkehgaped dnrvhgdln  
91 vttdtsvak gskqdlfvkl igqnsilgrt vvihagtdl gkggnaeskk tgnagarlac gvigltknkn s

C.n. *Cryptococcus neoformans* var. *neoformans* (AAK31917)

1 mvkavavikg dshvygtitf tqdsegapvc vsgeiknda dakrgfhvhe fgdntngcts agphynpfnk nhggptaaer hvgdlgnvqt  
91 ngcgvamvdi sdkvislfgp hsiigrsmvv hagtddlgkg gneeslktgn agarlacgvi giaa

C.p. *Claviceps purpurea* ergot fungus (CAC50073)

1 mvkavavirg dakvggtvfvf eqesesaptt itwditgnda nakrgfhiht fgdntngcts agphfnphgk thgaptdear hvgdlgnlet  
91 dgqgnakgsv kdehvkligp hsvigrtvvi hagtddlgkg dneeslktgn agprpacgvi giss

Ne *Neurospora crassa* (AAA63780)

1 mvkavavvrg dsnvkgtvif eqesesaptt itydisgndp nakrgfhiht fgdntngctsa gphfnphgt thgdrtaevr hvgdlgniet  
91 daqgnakgtv tdnlvklign esvigrtvvvh agtddlgkg gneeslktgn agprpacgvi gisq

PI Plant *Mesembryanthemum crystallinum* (P93258)

1 mvkavvvlss segvsgtvqf tqegsgpttv tgnvsglrpg lhghfvhalg dttngcmstg phfnpagkeh gapedetrha gdlgnitvgd  
91 dgtatftiid sqiptgpns ivgravvha dpddlgrggh elskatgnag grvacgvigl qg
